# Supplementary material for: Genotype-Dependent Variation of Nutritional Quality-Related Traits in Quinoa Seeds
Source: Preprints.org preprint supplement (doi:10.20944/preprints202108.0381.v1), 2021-08-18
Supplement: Supplementary file 1 [file Supplementary Figures.pdf › Supplementary Figures.pdf]

Supplementary Fig. 1

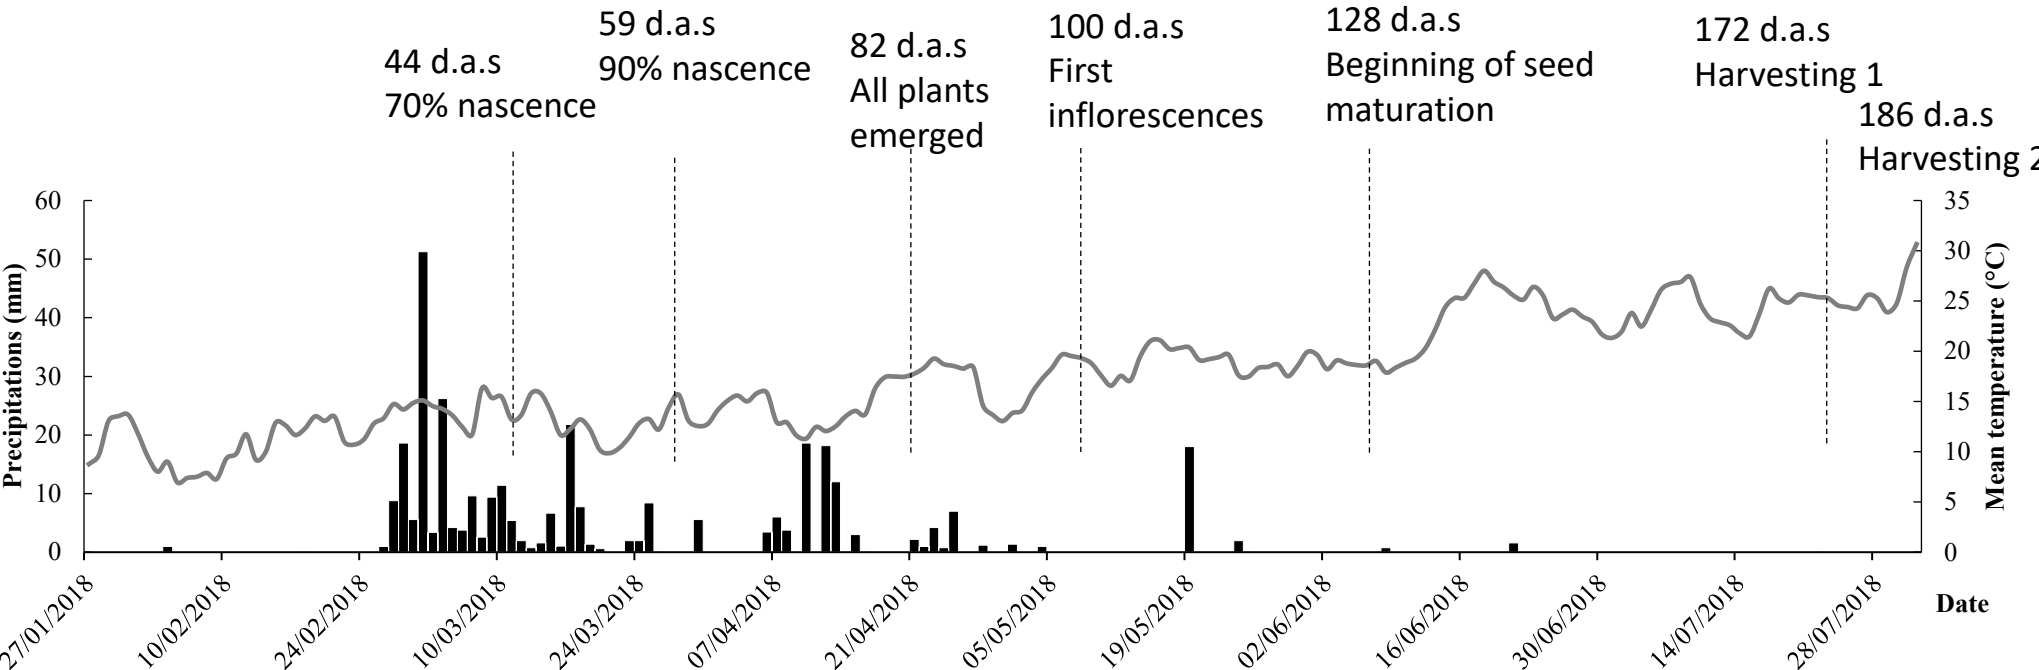

|                                                                                  |                                                                                    |                                                                                     |                                                                                      |                                                                                      |
|----------------------------------------------------------------------------------|------------------------------------------------------------------------------------|-------------------------------------------------------------------------------------|--------------------------------------------------------------------------------------|--------------------------------------------------------------------------------------|
| <b>A-SE-01</b>                                                                   | <b>A-SE-02</b>                                                                     | <b>A-SE-03</b>                                                                      | <b>A-SE-04</b>                                                                       | <b>A-SE-05</b>                                                                       |
|   |   |   |   |   |
| <b>A-SE-06</b>                                                                   | <b>A-SE-07</b>                                                                     | <b>A-SE-08</b>                                                                      | <b>A-SE-09</b>                                                                       | <b>A-SE-10</b>                                                                       |
|   |   |   |   |   |
| <b>A-SE-11</b>                                                                   | <b>A-SE-12</b>                                                                     | <b>A-SE-13</b>                                                                      | <b>A-SE-14</b>                                                                       | <b>A-SE-15</b>                                                                       |
|  |  |  |  |  |

[illegible]
